# Supplementary material for: Microscopic study of the corrosion behaviour of mild steel in ionic liquids for CO2 capture applications
Source: Royal Society of Chemistry journal article supplement (doi:10.1039/c5ra01097g), 2015-01-01
Supplement: c5ra01097g1.pdf [file c5ra01097g1.pdf]

## Electronic Supplementary Information (ESI)

### Microscopic study of the corrosion behaviour of mild steel in ionic liquids for CO<sub>2</sub> capture applications

I. S. Molchan,\* G. E. Thompson, P. Skeldon, R. Lindsay, J. Walton, E. Kouvelos, G. Em. Romanos, P. Falaras, A. G. Kontos, M. Arfanis, E. Siranidi, L. F. Zubeir, M. C. Kroon, J. Klöckner, B. Iliev and T. J. S. Schubert

\*Corresponding Author: igor.molchan@manchester.ac.uk

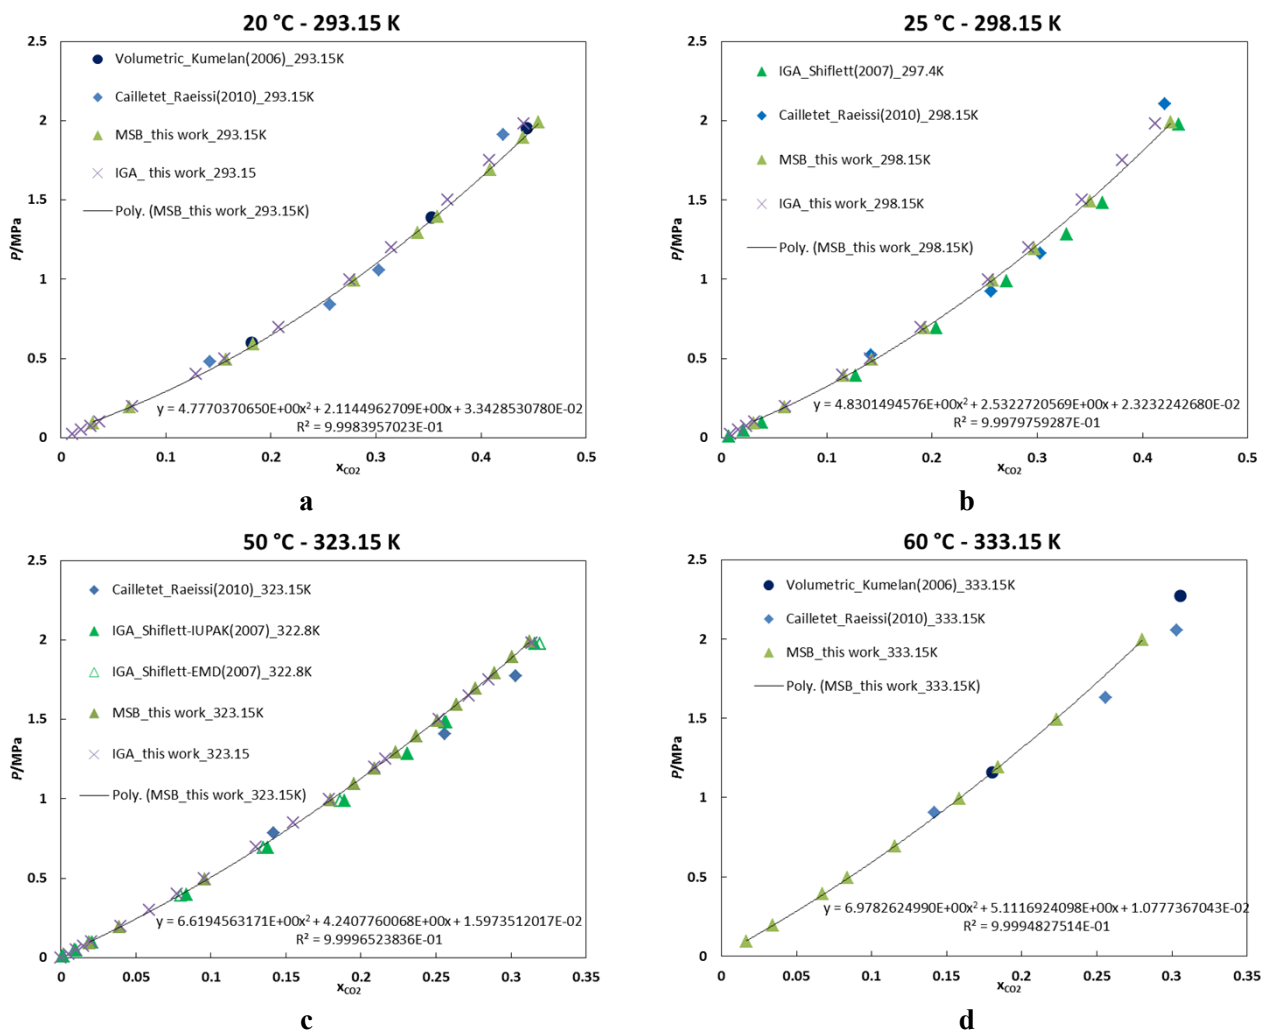

**Fig. S1** Absorption isotherms of CO<sub>2</sub> in the ionic liquid 1-hexyl-3-methylimidazolium bis[(trifluoromethyl)sulfonyl]imide at several temperatures. The results obtained with the IGA and MSB microbalances deviate by less than 3 %. The results obtained by other research groups for the same CO<sub>2</sub>/IL system are also shown in graphs.<sup>1,2,3</sup> The excellent agreement shows the accuracy of our measurements.

- 1 S. Raeissi, L. Florusse, and C. J. Peters, Scott-van Konynenburg, *J. Supercrit. Fluids*, 2010, **55**, 825.
- 2 J. Kumelan, Á. Pérez-Salado Kamps, D. Tuma and G. Maurer, *J. Chem. Thermodyn.*, 2006, **38**, 1396.
- 3 M. B. Shiflett and A. Yokozeki, *J. Phys. Chem. B*, 2007, **111**, 2070.

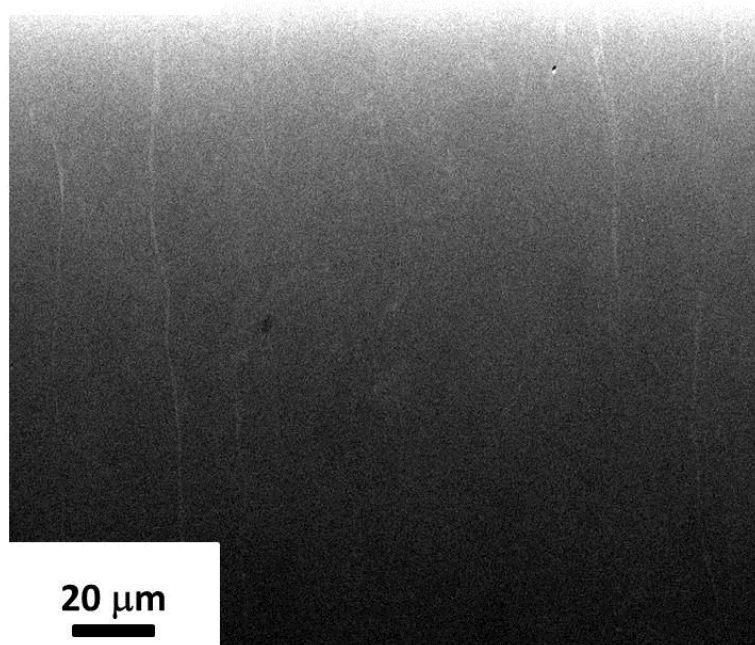

**Fig. S2** 2D X-ray image of the MS plate after immersion in [C<sub>4</sub>mim]TCM at 80 °C for 3 days. The rolling direction is parallel to the vertical axis of the image.

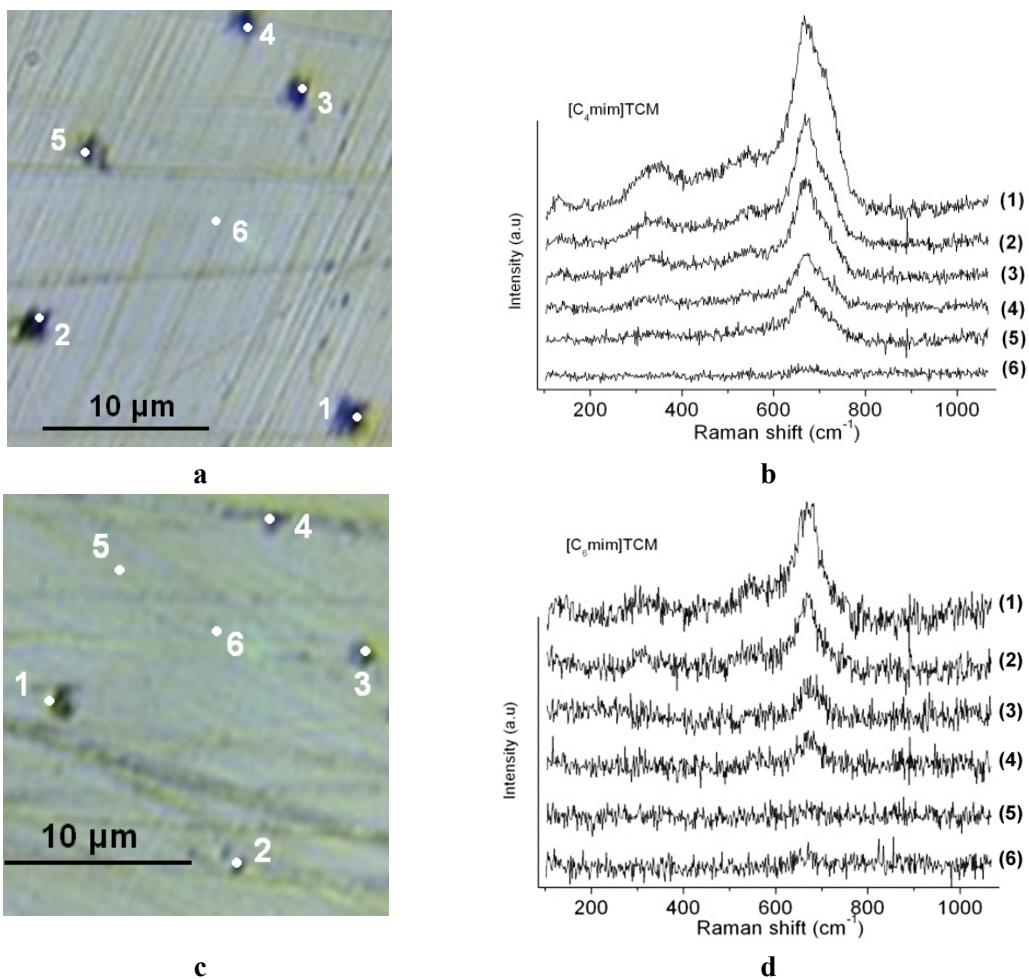

**Fig. S3** Optical micrographs and the respective micro-Raman spectra acquired from the selected spots on the surface of mild steel immersed in (a, b)  $[C_4mim]TCM$  and (c, d)  $[C_6mim]TCM(s)$  at 80 °C for 30 days.

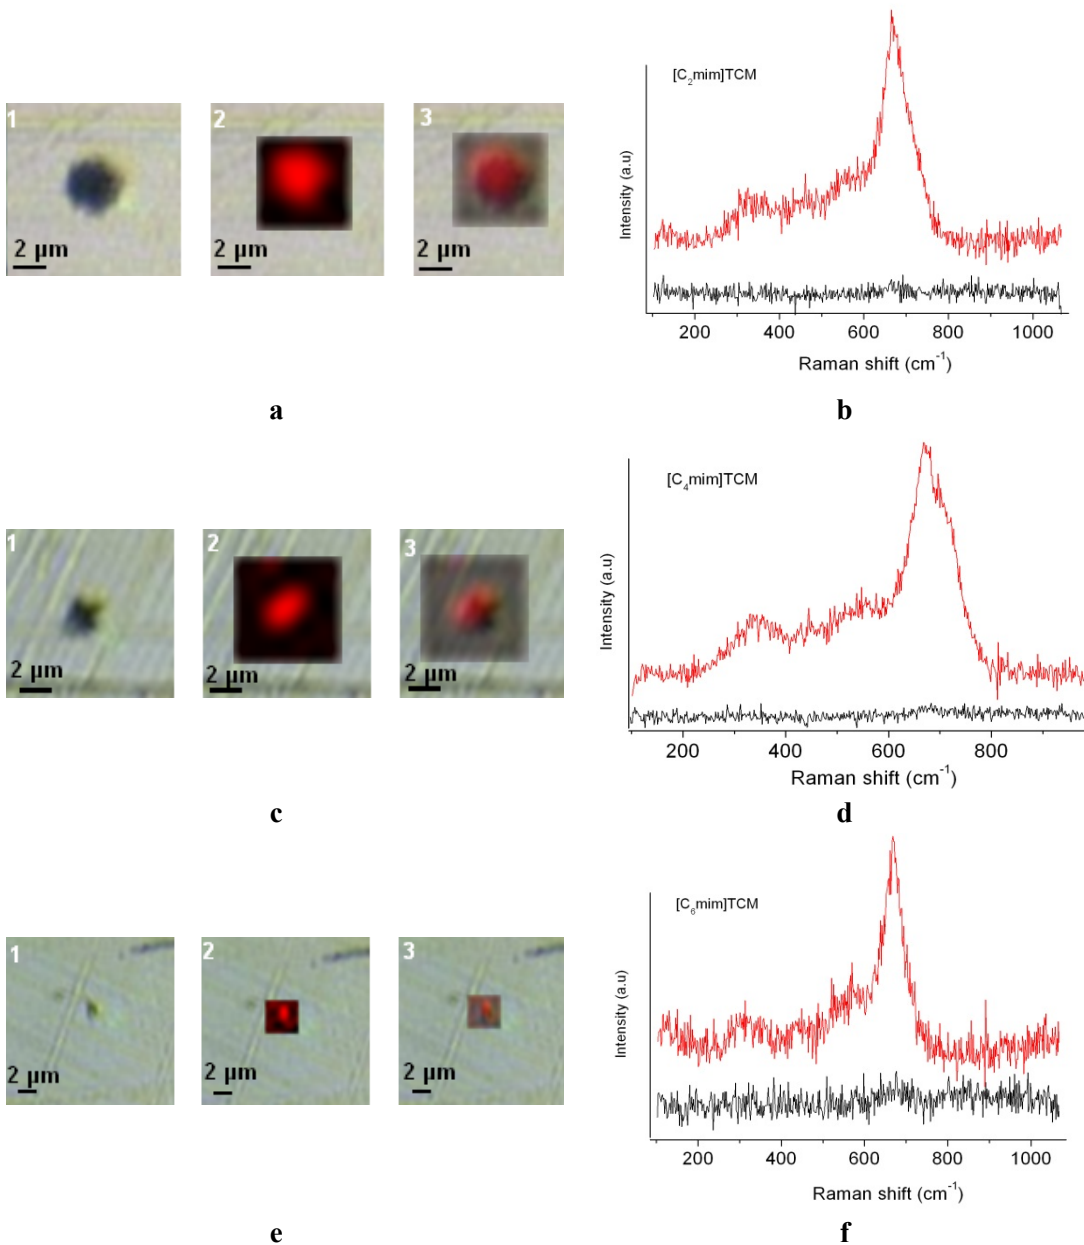

**Fig. S4** (a) [1] Optical image of a crater on the surface of mild steel immersed in  $[C_2\text{mim}]\text{TCM}$ ; [2]  $670\text{ cm}^{-1}$  Raman signal to baseline ratio mapping of the selected crater and its surrounded area in the chromatic scale; [3] the blend of the images [1] and [2]; (b) representative Raman spectra from the mapping; the red spectrum corresponds to a spot from the centre of the crater with intense Raman signal, while the black spectrum corresponds to a spot outside of its borders with weak signal. Corresponding images and spectra for mild steel immersed in  $[C_4\text{mim}]\text{TCM}$  and  $[C_6\text{mim}]\text{TCM}$ (s) are shown in (c, d) and (e, f) respectively. Immersion was carried out at temperature of  $80\text{ }^\circ\text{C}$  for 30 days.

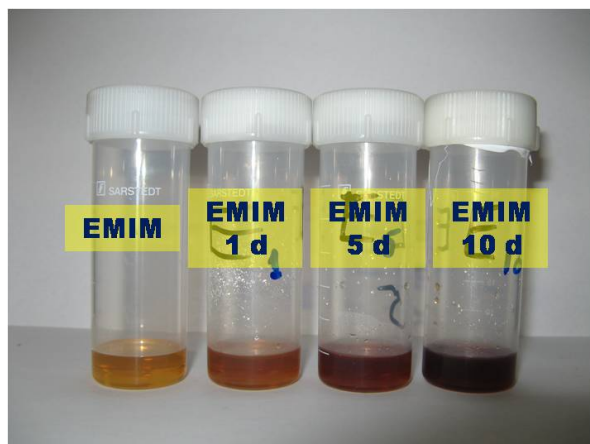

a

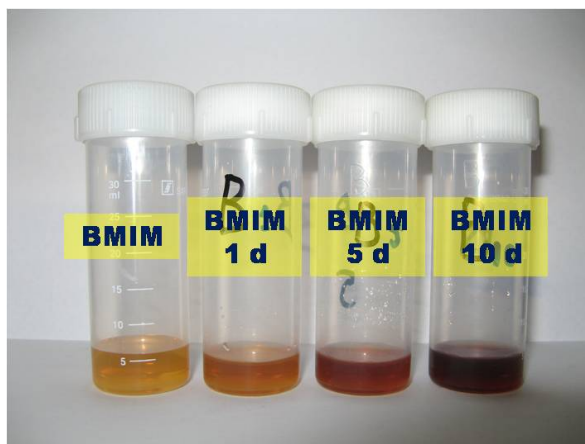

b

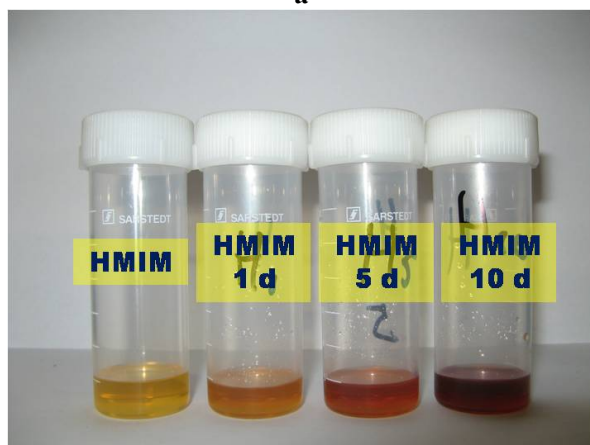

c

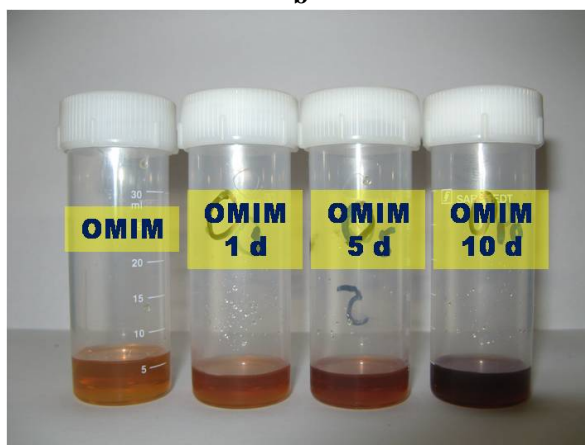

d

**Fig. S5** Photographic images of the appearance of (a)  $[C_2mim]TCM$ , (b)  $[C_4mim]TCM$  (c)  $[C_6mim]TCM(s)$  and (d)  $[C_8mim]TCM$ , designated as EMIM, BMIM, HMIM and OMIM respectively, after keeping with immersed mild steel at 80 °C for 1, 5 and 10 days. The samples on the left of each image are as-received ionic liquids.

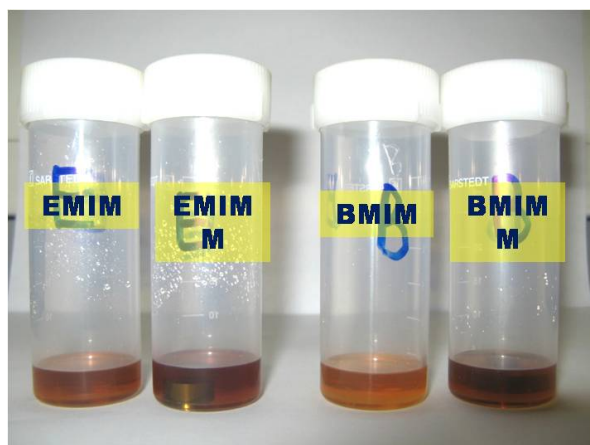

a

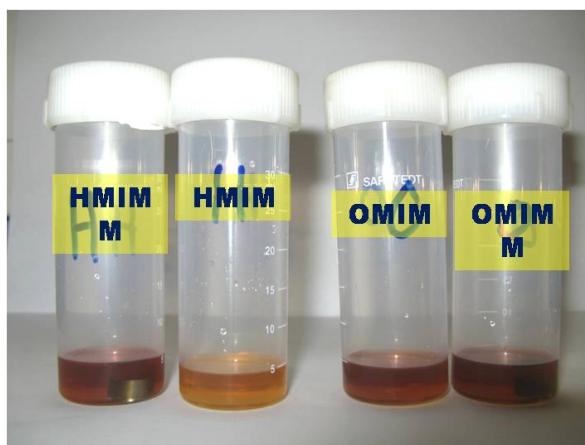

b

**Fig. S6** Photographic images comparing appearance of (a)  $[C_2mim]TCM$  and  $[C_4mim]TCM$  and (b)  $[C_6mim]TCM(s)$  and  $[C_8mim]TCM$  after keeping at 80 °C for 3 days with immersed mild steel (designated by "M") and without immersed alloy.
